# Supplementary material
Source: PubMed Central journal article supplement (PMC4906362)
Supplement: mmc1.pdf [file mmc1.pdf]

**Biophysical Journal, Volume 110**

**Supplemental Information**

**Contact Statistics Highlight Distinct Organizing Principles of Proteins  
and RNA**

**Lei Liu and Changbong Hyeon**

# Supporting Material : Contact statistics highlight distinct organizing principles of proteins and RNA

Lei Liu and Changbong Hyeon<sup>1</sup>

<sup>1</sup>*School of Computational Sciences, Korea Institute for Advanced Study, Seoul, Republic of Korea*

## EXTRACTION OF SCALING EXPONENT $\gamma$

We obtained the contact probability exponent  $\gamma$  by conducting linear regression on a part of  $P(s)$  data that behave as  $\sim s^{-\gamma}$  in log-log scale. There are two factors that may affect in determination of  $\gamma$ : (i)  $d_c$ , the cut-off distance to define a contact between two residues, affects the overall shape of  $P(s)$ ; (ii) The range of  $s$ ,  $s_{\min} < s < s_{\max}$ , to be fitted. Instead of manually tuning the fitting range ( $s_{\min} < s < s_{\max}$ ), we defined a parameter  $\varphi$  ( $0 < \varphi < 1$ ), such that the proportion of fitting range,  $(s_{\max} - s_{\min})/N$  where  $N$  is the chain length, is at least greater than an allocated threshold value,  $\varphi$ . For instance, if  $\varphi$  is set to 0.3 then the fit is made on more than 30 % of the entire data points. Thus, by fitting  $P(s)$  data over all possible pairs of  $s_{\min}$  and  $s_{\max}$  values which define the range of  $(s_{\min}, s_{\max})$  satisfying  $(s_{\max} - s_{\min})/N \geq \varphi$ , we determine the value of  $\gamma$  from the best fit which gives the smallest standard error relative to the data points.

Fig. S1A shows that the shape of  $P(s)$  for 23S-rRNA calculated with different  $d_c$  remains effectively identical, giving rise to a similar value of  $\gamma$ :  $\gamma = 1.11$  ( $d_c = 4 \text{ \AA}$ ),  $1.06$  ( $d_c = 5 \text{ \AA}$ ).  $p(\gamma)$ s for RNA molecules obtained from different  $d_c$  are also similar as shown in Fig. S1B.

Next, to study the effect of  $\varphi$  on  $\gamma$ , we set  $d_c = 4 \text{ \AA}$  and change the value of  $\varphi$  in the fit. We obtain  $\gamma = 1.11$  for  $\varphi = 0.3$ , and  $\gamma = 1.01$  with  $\varphi = 0.4$  (see Fig. S2A). Fig. S2B also shows that  $p(\gamma)$  with different  $\varphi$  are comparable. Analysis applied to protein shows similar results. A series of comparisons in Figs.S1 and S2 indicate that the average value of  $\gamma$  is insensitive to the parameters around the value we have chosen.

In addition, the overall shapes of  $p(\gamma)$  and  $\langle \bar{P}(s) \rangle$  are insensitive to the two threshold values of sequence similarity (90 and 30 %), which we imposed to select a set of non-homologous proteins (Fig. S3).

We analyzed 186 RNA and 16633 individual proteins whose size satisfies  $N \geq 50$ , available in PDB as of September 2015. Distributions of  $\gamma$  obtained from the optimal linear fittings on  $\log_{10} P(s)$  versus  $\log_{10} s$  with a correlation coefficient greater than 0.9 are presented in Fig.1A with  $\varphi = 0.3$ ,  $d_c = 4 \text{ \AA}$  for both RNAs and proteins. To highlight the robustness of our result presented in Fig.1A ( $\gamma$  vs.  $N$  plot), we specified the

95 % confidence interval of  $\gamma$  values using error-bar to each data point in Fig. S4.

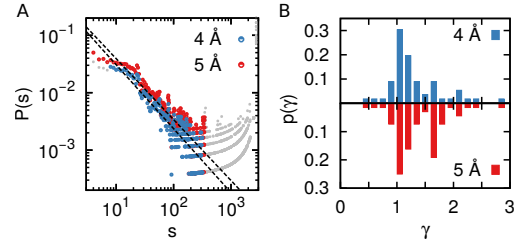

FIG. S1: (A) The contact probability versus sequence distance of 23S rRNA (PDB entry 2O45) with a cut-off distance of contacting  $d_c$  of value  $4 \text{ \AA}$  (blue) and  $5 \text{ \AA}$  (red). (B) Distributions of  $\gamma$  in RNA monomers with  $d_c$  of  $4 \text{ \AA}$  and  $5 \text{ \AA}$ .

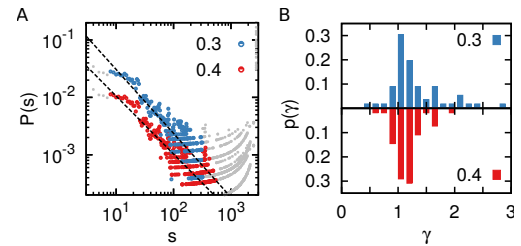

FIG. S2: (A) The contact probability versus sequence distance of 23S rRNA (PDB entry 2O45) with a minimum fraction of all data points used for fitting  $\varphi$  of 0.3 (blue) and 0.4 (red). The data points for  $\varphi = 0.4$ , as well as the fitted dashed line, are shifted downwards for visual comparison. (B) Distributions of  $\gamma$  in RNA monomers of  $\varphi$  0.3 and 0.4.

## CONTACT PROBABILITY BETWEEN TWO SITES OF A POLYMER

In general, the contact probability of two sites in polymer chain is determined by the volume available for the subchain ending with the two sites,  $[R(s)]^d$ ,

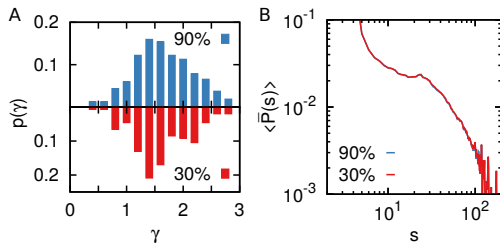

FIG. S3: Effects of imposing different threshold value for the sequence similarity of 90 % and 30 % to the protein structure database to compute  $p(\gamma)$  and  $\langle P(s) \rangle$ . No qualitative difference is found in the results.

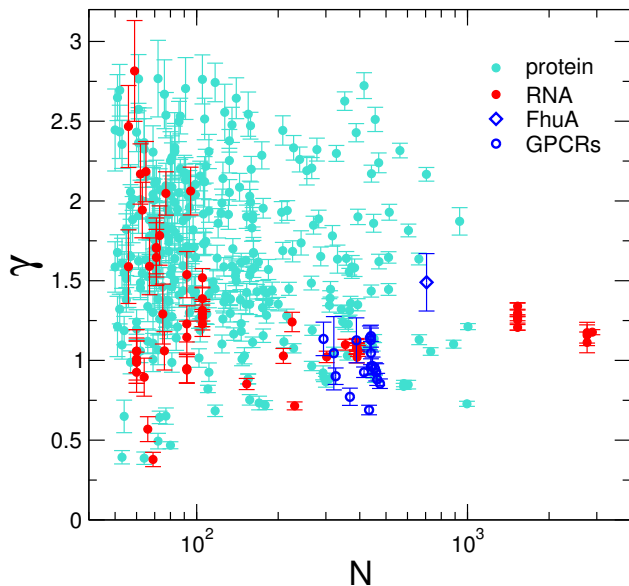

FIG. S4: Scatter plot of  $\gamma$  versus  $N$  for RNA (red) and proteins (cyan) with error bars (95 % confidence interval) for  $\gamma$  values.

with normalization condition  $\int P_s(r) d^d r = 1$  [14, 29]:

$$P_s(r) = \frac{1}{R(s)^d} \varphi\left(\frac{r}{R(s)}\right) \quad (S1)$$

$$\langle P(s) \rangle = \frac{1}{R(s)^d} \left\langle \left(\frac{r}{R(s)}\right)^g \right\rangle_{r \ll R(s)}$$

where  $r$  is the contact distance,  $R(s)$  is the size of polymer made of  $s$  monomers,  $d$  is the dimensionality, and  $g$  is the correlation hole exponent. With  $R(s) \sim s^\nu$  (see Fig. S5), we obtain the scaling relationship of contact probability,  $P(s) \sim s^{-\nu(d+g)}$ .

(i) When the excluded volume interaction is fully screened, a test chain (or subchain over a certain

length) is ideal. In this case,  $\varphi(x) \sim e^{-3x^2/2}$ . Thus, the correlation hole exponent  $g = 0$  [65] and  $R \sim s^\nu$  with  $\nu = 1/2$ , which leads to  $P(s) \sim s^{-\nu d} \sim s^{-3/2}$ .

(ii) If the chain adopts an *effectively homogeneous* space-filling configuration, but the interaction between monomers is weak and the excluded volume interaction is still fully screened as in a concentrated melt, then  $g = 0$ ,  $d = 3$ , and  $\nu = 1/3$ , which leads to  $P(s) \sim s^{-1}$ .

(iii) If the chain organization is *inhomogeneous* leading to an anisotropic arrangement because of strong monomer-monomer interactions [26], which for the case of RNA leads to formation of independently stable helices, then  $R(s)$  still satisfies  $R(s) \sim s^{1/3}$  but the effective dimensionality of the sampling space ( $d_{\text{eff}}$ ) would be less than 3. Thus,  $P(s) \sim s^{-d_{\text{eff}}/3}$ , and  $\gamma = d_{\text{eff}}/3 < 1$ , which accounts for the contact probability exponent smaller than 1.

(iv) Note that when the subchain interactions (repulsion and attraction) are screened ( $g = 0$ ),  $P(s)$  and  $R(s)$  are related as  $P(s) \sim R(s)^{-d}$ . This relationship particularly holds good for intermediate range of  $s$ :  $P(s) \sim s^{-3/2} \leftrightarrow R(s) \sim s^{1/2}$  (ideal chain) and  $P(s) \sim s^{-1} \leftrightarrow R(s) \sim s^{1/3}$  (crumpled chain) (see Fig. S5). The scaling exponent of  $3/5$  at  $s < 10$  in Fig. S5 is due to the volume exclusion interaction at short range  $s$ .

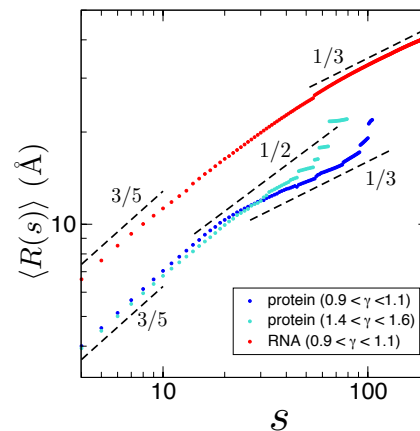

FIG. S5: Mean radius of gyration of subchain as a function of subchain length  $s$  for proteins and RNA that display contact probability exponent in a specified range of  $\gamma$ . The structures in the specified range of  $\gamma$  were collected from Fig. 1 and their  $R(s)$ s were calculated.

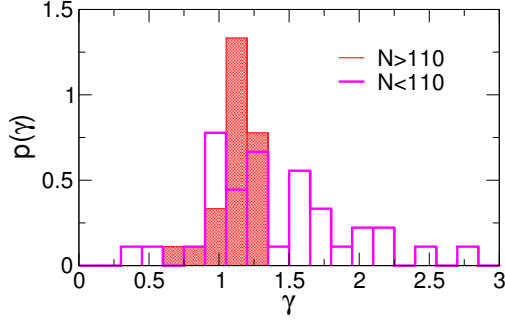

FIG. S6: Distribution of  $\gamma$  value for RNA with  $N > 110$  and  $N < 110$ .  $\gamma_{N>110}^{\text{RNA}} = 1.12 \pm 0.14$  and  $\gamma_{N<110}^{\text{RNA}} = 1.41 \pm 0.53$ .

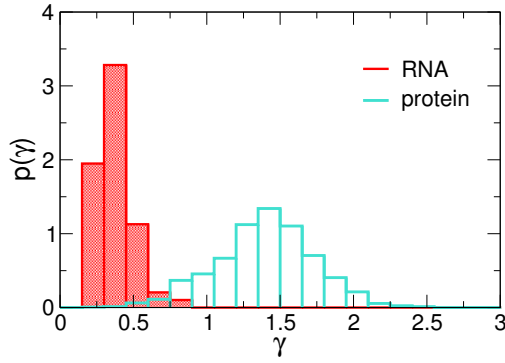

FIG. S7: Distribution of contact probability exponent calculated for the short range of  $s$ ,  $s < 20$ .  $\gamma^{\text{RNA}} = 0.38 \pm 0.13$  and  $\gamma^{\text{pro}} = 1.40 \pm 0.33$ .

|      |      |      |      |      |      |      |      |
|------|------|------|------|------|------|------|------|
| 2M58 | 2MIY | 1FIR | 6TNA | 1EHZ | 1TRA | 4TRA | 1TN1 |
| 1TN2 | 3TRA | 2TRA | 3BBV | 1VTQ | 4PQV | 3A3A | 3CW6 |
| 2HOP | 1I9V | 3L0U | 2K4C | 3D2G | 4NYD | 2HOM | 3GX6 |
| 2GIS | 3GX2 | 3IQN | 4B5R | 2YDH | 4RZD | 3F2Q | 3F2W |
| 3F30 | 3F2X | 3F2T | 3F2Y | 1U9S | 3DHS | 1Y0Q | 4C4Q |
| 2A2E | 3BWP | 4FAX | 4E8P | 4E8R | 4E8Q | 4E8N | 4DS6 |
| 4E8M | 4FAQ | 3J2B | 3J2H | 3J2D | 2YKR | 3J28 | 3J2A |
| 2O45 | 2O43 | 2O44 | 1C2W |      |      |      |      |

TABLE I: PDB entries of RNA analyzed in Fig. 1.

|      |      |      |      |      |      |      |      |
|------|------|------|------|------|------|------|------|
| 2MGW | 2JY5 | 2CR8 | 2RRU | 2KAK | 2DAH | 2EPS | 1JJR |
| 1KMX | 2KQB | 1YSM | 2ECM | 2KMU | 1KFT | 2KPI | 2M8E |
| 2K2T | 2REL | 2YSD | 2L4E | 2MWR | 2YRG | 3GOH | 1Z60 |
| 2KKJ | 1A7I | 1VYX | 2M2F | 2JXD | 2DAL | 3WIT | 2M9W |
| 2YSJ | 1UEO | 1AA3 | 4A3N | 1WG2 | 2D8U | 1WFH | 1HYI |
| 1BW5 | 2DZL | 1X4P | 1Vfy | 1X4W | 1HTA | 1SF0 | 1H0Z |
| 2EA6 | 2MFK | 2DI0 | 2EWT | 2RMR | 3H33 | 1RIY | 4TXA |
| 2DA7 | 2LGW | 2JVG | 1X61 | 1WEE | 1X4K | 2DJB | 4P3V |
| 2CT5 | 2LEK | 2HI3 | 1G33 | 2EP4 | 1NEQ | 1APJ | 1WFP |
| 2JXW | 2KW9 | 1SIG | 2M4G | 2LT1 | 1WYS | 1X68 | 2ENN |
| 2E6S | 2D9H | 2ECT | 1E4U | 1JQ0 | 1J3C | 1MJ4 | 4U12 |
| 2MLB | 1UHC | 2CR7 | 1KDU | 1QRY | 1X3H | 2CSY | 2ECL |
| 1RWJ | 2LDR | 4CIK | 3J0R | 1UHA | 4EIF | 1X63 | 2DOE |
| 2LQL | 1CC5 | 1XFE | 2L0S | 3CP1 | 3ZJ1 | 3BT4 | 2LRQ |
| 1IPG | 2Q18 | 4IYL | 2ECW | 2LV2 | 1LMJ | 1ABA | 1C9F |
| 1F1F | 2CT2 | 1C6R | 1FP0 | 2KW1 | 4GPS | 1CTJ | 2M5W |
| 1Y02 | 2D8Y | 2E6R | 1WEO | 2CS3 | 1FBR | 2LXG | 2LGP |
| 2MIQ | 1SJ6 | 1WIA | 2JSN | 2DMD | 2VTK | 3PO8 | 1OPC |
| 2YRE | 2LGV | 1T1D | 3H6N | 1JHG | 4BGC | 2O4A | 2CQK |
| 2CTK | 3GCE | 2K4J | 3DQY | 1X0T | 2JVL | 1HKF | 2CS8 |
| 3O8V | 3DVI | 2CTW | 4EEU | 2MLK | 1ZOX | 2XXC | 2EO3 |
| 4TVM | 2IVW | 2LW4 | 4HWM | 2KQR | 2JXN | 2HC5 | 1T6A |
| 4ZBH | 1UJX | 2MMZ | 2LHT | 1JUG | 2RA9 | 2XWS | 1G3P |
| 2QYZ | 2FYG | 3O5E | 2ES0 | 4NAZ | 3E2I | 1DQG | 1VSR |
| 1KQW | 1E29 | 2FVV | 3W9K | 1NL1 | 1WK0 | 1XN5 | 2IN0 |
| 2NWF | 2L5Q | 2P0B | 2MO5 | 3ZUI | 2HNA | 2JY9 | 4MYM |
| 3N9D | 2N48 | 4M4Z | 3FME | 1ENV | 2D37 | 2XB3 | 1ZND |
| 4GNY | 4LD1 | 3UF4 | 1D7P | 1EW3 | 3OUQ | 1E88 | 2LFU |
| 2KIG | 2KFU | 1KLO | 3NZM | 2M47 | 4JHG | 1RL6 | 3TXO |
| 2LZM | 2NN5 | 3W9R | 2CP6 | 4F47 | 1EH6 | 1CDY | 2R6V |
| 3K21 | 3WJT | 1WV3 | 4M6T | 2D5M | 3KBG | 1J3G | 1EJE |
| 1JM1 | 3TFM | 4QA8 | 1HXN | 4E1B | 4IT3 | 4JZC | 1EMA |
| 2K18 | 3HBK | 3NO3 | 4PQ0 | 2PNN | 1LVA | 3LTI | 4JS8 |
| 4DWO | 2A1L | 4NW4 | 3V75 | 5BN7 | 1DUW | 3JRP | 2QLU |
| 2LQW | 4X36 | 2HES | 4GGC | 4GGA | 4V16 | 4AA8 | 2FGQ |
| 4AF8 | 1VPR | 2PMN | 2XE1 | 2ASI | 2ZYL | 1T6E | 3BA0 |
| 1J6Z | 4QDC | 4GQ1 | 1FEP | 3GRE | 4UQE | 4MSX | 3R1K |
| 3ACP | 2DH2 | 4COT | 3DWO | 1QCF | 1FMK | 1W52 | 1DQ3 |
| 1G0D | 3K5W | 2OBD | 4NOX | 4FWW | 2E84 | 1Z1N | 4AW7 |
| 1XEZ | 4TLW | 1PI6 | 4UMW | 4BBJ | 3OKT | 1QFG | 4MHC |
| 2OAJ | 4UP5 | 1HN0 | 3KLK |      |      |      |      |

TABLE II: PDB entries of proteins analyzed in Fig. 1.

|      |      |      |      |      |      |      |      |
|------|------|------|------|------|------|------|------|
| 2JX9 | 1ISR | 2LNL | 2RH1 | 2YDV | 2ZIY | 3C9L | 3EHS |
| 3EML | 3N94 | 3OE6 | 3RZE | 3UON | 3V2Y | 3VW7 | 4DKL |
| 4EJ4 | 4F11 | 4IB4 | 1QJQ |      |      |      |      |

TABLE III: PDB entries of GPCRs analyzed in Fig. 1.
